# Supplementary material
Source: publisher figshare collection journal article supplement (https://diabetesjournals.figshare.com/ndownloader/files/22419039)
Supplement: Supplementary file 1 [file 22419039]

Supplementary Table 1. ICPC-2 and ICD-9-CM in any complications of cardiovascular disease and chronic kidney disease

| Disease | | ICPC-2 | ICD-9-CM | Clinical parameters |
| --- | --- | --- | --- | --- |
| Cardiovascular disease | Coronary heart disease | K74-K76 | 410.x-414.x, 798.x | N/A |
| Heart failure | K77 | 428.x | N/A |
| Stroke | K89-K91 | 430.x-438.x | N/A |
| Chronic Kidney disease | Moderate chronic kidney disease | NA | 585.3 | eGFR ≥ 30ml/min/1.73m2 & eGFR < 60ml/min/1.73m2 |
| Severe chronic kidney disease | NA | 585.4-585.6 | eGFR < 30ml/min/1.73m2 |
| Diabetes Mellitus | | T89, T90 | NA | NA |

ICPC-2 = the International Classification of Primary Care-2; ICD-9-CM = the International Classification of Diseases, Ninth Edition, Clinical Modification; N/A = Not applicable;

Supplementary Table 2. Data completion rates of baseline covariates of patients by disease status

| Factor | Total (N = 210,271) | (1) (N = 165,871) | (2) (N = 11,922) | (3) (N = 10,736) | (4) (N = 11,367) | (5) (N = 1,906) | (6) (N = 1,898) | (7) (N = 2,413) | (8) (N = 2,091) | (9) (N = 424) | (10) (N = 710) | (11) (N = 714) | (12) (N = 219) |
| --- | --- | --- | --- | --- | --- | --- | --- | --- | --- | --- | --- | --- | --- |
| Gender | 100% | 100% | 100% | 100% | 100% | 100% | 100% | 100% | 100% | 100% | 100% | 100% | 100% |
| Age, year | 100% | 100% | 100% | 100% | 100% | 100% | 100% | 100% | 100% | 100% | 100% | 100% | 100% |
| Smoking status | 95% | 98% | 89% | 91% | 92% | 74% | 78% | 80% | 80% | 60% | 60% | 67% | 52% |
| Duration of diabetes | 84% | 89% | 66% | 72% | 71% | 47% | 47% | 51% | 50% | 33% | 31% | 37% | 23% |
| SBP, mmHg | 98% | 99% | 97% | 96% | 98% | 93% | 94% | 94% | 95% | 91% | 88% | 92% | 87% |
| DBP, mmHg | 98% | 99% | 97% | 96% | 98% | 93% | 94% | 94% | 95% | 91% | 88% | 92% | 87% |
| HbA1c, % | 97% | 98% | 96% | 97% | 97% | 97% | 95% | 96% | 95% | 95% | 96% | 96% | 92% |
| LDL-C, mmol/L | 89% | 90% | 88% | 91% | 82% | 83% | 88% | 87% | 82% | 84% | 83% | 85% | 85% |
| BMI, kg/m2 | 76% | 80% | 60% | 65% | 68% | 52% | 46% | 54% | 51% | 38% | 41% | 42% | 35% |
| Use of anti-hypertensive drugs | 100% | 100% | 100% | 100% | 100% | 100% | 100% | 100% | 100% | 100% | 100% | 100% | 100% |
| Use of anti-diabetes drugs | 100% | 100% | 100% | 100% | 100% | 100% | 100% | 100% | 100% | 100% | 100% | 100% | 100% |
| Use of lipid-lowering agents | 100% | 100% | 100% | 100% | 100% | 100% | 100% | 100% | 100% | 100% | 100% | 100% | 100% |

(1) = None of cardiovascular disease or Moderate/Severe chronic kidney disease; (2) = Stroke only; (3) = Heart diseases only; (4) = Moderate chronic kidney disease only; (5) = Severe chronic kidney disease only; (6) = Stroke and Heart diseases; (7) = Heart diseases and Moderate chronic kidney disease; (8) = Stroke and Moderate chronic kidney disease; (9) = Stroke and severe chronic kidney disease; (10) = Heart diseases and Severe chronic kidney disease; (11) = Stroke, Heart diseases and Moderate chronic kidney disease; (12) = Stroke, Heart diseases and Severe chronic kidney disease

SBP = Systolic Blood Pressure; DBP = Diastolic Blood Pressure; HbA1c = Hemoglobin A1c Test; LDL-C = Low Density Lipoprotein - Cholesterol; BMI = Body Mass Index

Supplementary table 3. Additive interaction effects between disease status groups

| Addictive Interaction Effect | Disease Status at Baseline (95% CI) | | | | |
| --- | --- | --- | --- | --- | --- |
| Stroke and heart disease | Moderate CKD and heart disease | Severe CKD and heart disease | Moderate CKD and stroke | Severe CKD and stroke |
| REFI | 0.15 (0.10,0.21) | 0.02 (-0.03,0.07) | 0.18 (0.10,0.25) | 0.02 (-0.03,0.07) | 1.10 (1.02,1.17) |
| AP | 0.06 (0.04,0.08) | 0.01 (-0.01,0.03) | 0.04 (0.02,0.05) | 0.01 (-0.01,0.03) | 0.19 (0.18,0.20) |
| SI | 1.12 (1.08,1.15) | 1.01 (0.97,1.05) | 1.05 (1.03,1.07) | 1.02 (0.98,1.05) | 1.29 (1.27,1.31) |

CKD = Chronic Kidney Disease; CI = Confidence Interval
REFI = Relative risk due to interaction; AP = The proportion of disease among those with both exposures due to the interaction effect; SI = Synergy Index

Notes:

* Significant at 0.05 level by multivariable Cox proportional hazard regression

Supplementary Table 4. Annual hospitalization cost, accident and emergency cost, specialist out-patient cost, general out-patient cost and allied cost (in USD) by disease status at baseline

| Disease Status at Baseline | Annual hospitalization costs | Annual accident and emergency services costs | Annual specialist out-patient clinic services costs | Annual general out-patient clinic services costs | Annual allied health professionals service costs |
| --- | --- | --- | --- | --- | --- |
|
| None of CVD or Moderate/Severe CKD | 3,294.5 (11,716.9) | 99.4 (228.0) | 417.0 (515.4) | 209.4 (124.1) | 45.0 (127.5) |
| Stroke | 10,088.9 (24,121.0) | 228.6 (397.6) | 514.9 (524.2) | 160.8 (136.4) | 44.3 (147.7) |
| Heart diseases | 8,050.2 (18,684.0) | 218.1 (361.6) | 641.4 (563.8) | 156.3 (145.9) | 48.9 (126.7) |
| Moderate CKD | 10,158.1 (20,772.6) | 230.9 (353.6) | 651.2 (573.9) | 165.2 (132.5) | 40.2 (104.0) |
| Severe CKD | 22,675.0 (34,472.0) | 434.5 (550.6) | 997.7 (743.6) | 103.3 (152.9) | 43.4 (95.3) |
| Stroke and Heart diseases | 16,396.2 (30,051.0) | 377.5 (539.9) | 643.8 (575.6) | 128.4 (152.2) | 50.4 (220.2) |
| Heart diseases and Moderate CKD | 18,648.6 (31,814.7) | 404.6 (533.9) | 798.4 (638.2) | 126.8 (149.7) | 44.7 (114.5) |
| Stroke and Moderate CKD | 16,290.4 (29,011.2) | 335.9 (427.7) | 631.5 (545.5) | 134.7 (140.6) | 40.6 (124.6) |
| Stroke and Severe CKD | 31,807.1 (42,017.3) | 576.8 (648.3) | 872.5 (662.8) | 107.6 (167.4) | 34.6 (82.4) |
| Heart diseases and Severe CKD | 35,621.3 (45,675.2) | 662.9 (736.3) | 977.5 (691.9) | 95.2 (154.1) | 48.0 (134.2) |
| Stroke, Heart diseases and Moderate CKD | 25,182.8 (35,794.7) | 524.3 (616.0) | 719.6 (585.3) | 112.5 (141.0) | 47.2 (145.3) |
| Stroke, Heart diseases and Severe CKD | 42,704.4 (48,059.8) | 827.7 (814.4) | 952.1 (794.7) | 92.2 (145.5) | 40.8 (147.5) |

CVD = Cardiovascular disease; CKD = Chronic Kidney Disease;

Notes:

The values are presented in mean (Standard Deviation).
The unit cost for hospitalization, accident and emergency services, specialist out-patient clinic services, general out-patient clinic services and allied health professionals service were US$587 per day, 127, 142, 49 and 71 per visit, respectively.

Supplementary Table 5a. Incidence rates of all-cause mortality by disease status at baseline in different subgroups

| Disease Status at Baseline | Females | Males | Age < 65 years | Age ≥ 65 years | Smoking status (Non-smoker) | Smoking status (Smoker) | Duration of DM (<5 years) | Duration of DM (≥ 5 years) | Blood Pressure (<130/80mmHg) | Blood Pressure (≥130/80mmHg) | HbA1c (<7%) | HbA1c (≥7%) |
| --- | --- | --- | --- | --- | --- | --- | --- | --- | --- | --- | --- | --- |
| None of CVD or Moderate/Severe CKD | 1.82 | 2.46 | 0.79 | 3.92 | 1.84 | 2.41 | 1.35 | 2.72 | 2.00 | 2.17 | 2.24 | 2.01 |
| Stroke | 5.99 | 7.34 | 2.18 | 8.31 | 5.38 | 5.94 | 3.88 | 7.88 | 6.85 | 6.59 | 7.17 | 6.12 |
| Heart diseases | 5.28 | 5.59 | 1.74 | 6.89 | 4.44 | 5.19 | 3.13 | 6.29 | 5.34 | 5.48 | 5.87 | 5.07 |
| Moderate CKD | 7.65 | 9.31 | 3.95 | 9.06 | 7.18 | 9.85 | 5.17 | 9.01 | 7.86 | 8.42 | 8.55 | 7.97 |
| Severe CKD | 17.28 | 18.38 | 9.83 | 20.43 | 13.46 | 16.57 | 8.43 | 19.19 | 16.77 | 18.09 | 20.02 | 15.44 |
| Stroke and Heart diseases | 11.11 | 11.51 | 3.95 | 12.65 | 8.57 | 8.38 | 5.85 | 12.68 | 12.09 | 10.93 | 12.07 | 10.42 |
| Heart diseases and Moderate CKD | 13.18 | 14.99 | 5.88 | 14.60 | 11.05 | 14.74 | 9.93 | 14.42 | 13.65 | 13.92 | 14.41 | 13.35 |
| Stroke and Moderate CKD | 12.82 | 15.85 | 8.51 | 14.66 | 11.37 | 16.79 | 9.37 | 14.95 | 14.34 | 14.06 | 14.44 | 13.83 |
| Stroke and Severe CKD | 27.70 | 28.48 | 19.78 | 29.58 | 20.86 | 25.82 | 14.13 | 30.94 | 24.22 | 29.49 | 29.61 | 26.02 |
| Heart diseases and Severe CKD | 27.38 | 26.55 | 14.53 | 29.72 | 19.41 | 21.08 | 12.61 | 28.15 | 25.25 | 27.83 | 30.26 | 24.02 |
| Stroke, Heart diseases and Moderate CKD | 19.48 | 19.04 | 12.09 | 19.67 | 14.61 | 16.32 | 11.26 | 20.11 | 19.06 | 19.41 | 19.71 | 18.87 |
| Stroke, Heart diseases and Severe CKD | 44.22 | 42.62 | 42.67 | 43.60 | 30.60 | 33.80 | 26.48 | 44.65 | 45.50 | 42.92 | 52.44 | 32.31 |

CVD = Cardiovascular disease; CKD = Chronic Kidney Disease; CI = Confidence Interval; DM = Diabetes Mellitus; HbA1c = Hemoglobin A1c Test

The incidence rate were based on Cases/100 Person Years

Supplementary Table 5b. Incidence rates of all-cause mortality by disease status at baseline in different subgroups

| Disease Status at Baseline | LDL-C (<2.6mmol/L) | LDL-C (≥2.6mmol/L) | BMI (<27.5kg/m2) | BMI (≥27.5kg/m2) | Use of anti-hypertension drugs (No) | Use of anti-hypertension drugs (Yes) | Use of anti-diabetic drugs (No) | Use of anti-diabetic drugs (Yes) | Use of lowering lipid drugs (No) | Use of lowering lipid drugs (Yes) |
| --- | --- | --- | --- | --- | --- | --- | --- | --- | --- | --- |
| None of CVD or Moderate/Severe CKD | 2.37 | 2.02 | 2.63 | 1.65 | 1.47 | 2.45 | 1.94 | 2.15 | 2.15 | 1.72 |
| Stroke | 6.97 | 6.50 | 8.09 | 5.28 | 7.05 | 6.58 | 6.69 | 6.66 | 7.30 | 5.03 |
| Heart diseases | 5.51 | 5.37 | 6.70 | 4.57 | 4.73 | 5.56 | 5.19 | 5.50 | 6.08 | 4.29 |
| Moderate CKD | 8.37 | 8.20 | 9.64 | 6.87 | 8.84 | 8.17 | 8.69 | 8.16 | 8.42 | 6.97 |
| Severe CKD | 18.00 | 17.56 | 19.92 | 15.42 | 15.47 | 18.07 | 19.12 | 17.35 | 17.78 | 17.39 |
| Stroke and Heart diseases | 10.84 | 11.73 | 13.27 | 9.74 | 12.32 | 11.16 | 12.58 | 10.88 | 12.60 | 9.44 |
| Heart diseases and Moderate CKD | 13.96 | 13.72 | 15.69 | 12.23 | 13.93 | 13.82 | 15.00 | 13.55 | 14.57 | 12.52 |
| Stroke and Moderate CKD | 13.86 | 14.32 | 15.31 | 12.84 | 17.02 | 13.82 | 15.65 | 13.79 | 15.17 | 11.43 |
| Stroke and Severe CKD | 26.43 | 29.55 | 29.30 | 26.91 | 25.95 | 28.30 | 26.24 | 28.63 | 28.83 | 26.21 |
| Heart diseases and Severe CKD | 28.73 | 25.49 | 30.84 | 24.20 | 23.25 | 27.69 | 32.25 | 25.73 | 29.43 | 23.34 |
| Stroke, Heart diseases and Moderate CKD | 19.17 | 19.45 | 21.67 | 16.73 | 27.04 | 18.62 | 23.96 | 18.12 | 21.64 | 16.08 |
| Stroke, Heart diseases and Severe CKD | 44.53 | 42.52 | 46.66 | 38.08 | 26.84 | 46.00 | 53.70 | 39.90 | 43.97 | 42.93 |

CVD = Cardiovascular disease; CKD = Chronic Kidney Disease; CI = Confidence Interval; LDL-C = Low Density Lipoprotein – Cholesterol; BMI = Body Mass Index

The incidence rate were based on Cases/100 Person Years

Supplementary Table 6a. Adjusted hazard ratios of all-cause mortality by disease status at baseline in different subgroups

| Disease Status at Baseline | Males | Females | Age < 65 years | Age ≥ 65 years | Smoking status (Smoker) | Smoking status (Non-smoker) | Duration of DM (<5 years) | Duration of DM (≥ 5 years) | Blood Pressure (<130/80mmHg) | Blood Pressure (≥130/80mmHg) | HbA1c (<7%) | HbA1c (≥7%) |
| --- | --- | --- | --- | --- | --- | --- | --- | --- | --- | --- | --- | --- |
| None of CVD or Moderate/Severe CKD | 1 (Reference) | 1 (Reference) | 1 (Reference) | 1 (Reference) | 1 (Reference) | 1 (Reference) | 1 (Reference) | 1 (Reference) | 1 (Reference) | 1 (Reference) | 1 (Reference) | 1 (Reference) |
| Stroke | 1.89 (1.81,1.98) | 1.81 (1.74,1.88) | 2.63 (2.39,2.89) | 2.15 (2.09,2.22) | 1.89 (1.83,1.95) | 1.51 (1.37,1.66) | 1.86 (1.75,1.98) | 1.85 (1.78,1.92) | 1.86 (1.76,1.96) | 1.85 (1.78,1.91) | 1.92 (1.84,1.99) | 1.76 (1.69,1.84) |
| Heart diseases | 1.55 (1.48,1.63) | 1.49 (1.42,1.56) | 2.14 (1.93,2.38) | 1.78 (1.71,1.84) | 1.53 (1.47,1.58) | 1.45 (1.30,1.62) | 1.52 (1.41,1.64) | 1.51 (1.45,1.57) | 1.54 (1.45,1.63) | 1.50 (1.44,1.57) | 1.57 (1.50,1.65) | 1.46 (1.40,1.53) |
| Moderate CKD | 1.94 (1.86,2.01) | 1.80 (1.72,1.88) | 4.57 (4.15,5.02) | 2.22 (2.15,2.28) | 1.89 (1.83,1.94) | 1.76 (1.60,1.94) | 1.87 (1.72,2.02) | 1.89 (1.82,1.95) | 1.76 (1.67,1.85) | 1.94 (1.88,2.01) | 1.88 (1.81,1.96) | 1.89 (1.81,1.96) |
| Severe CKD | 5.17 (4.83,5.54) | 4.43 (4.08,4.81) | 11.50 (10.02,13.19) | 5.15 (4.86,5.46) | 4.81 (4.55,5.08) | 5.30 (4.33,6.49) | 4.79 (4.04,5.66) | 4.85 (4.55,5.17) | 4.22 (3.82,4.67) | 5.15 (4.84,5.48) | 5.34 (4.98,5.74) | 4.27 (3.95,4.62) |
| Stroke and Heart diseases | 2.62 (2.41,2.85) | 2.45 (2.26,2.67) | 4.80 (3.76,6.13) | 3.33 (3.13,3.54) | 2.57 (2.42,2.73) | 2.08 (1.60,2.70) | 2.50 (2.19,2.85) | 2.54 (2.36,2.72) | 2.71 (2.46,2.99) | 2.42 (2.25,2.60) | 2.53 (2.34,2.73) | 2.49 (2.28,2.73) |
| Heart diseases and Moderate CKD | 2.74 (2.57,2.91) | 2.39 (2.21,2.58) | 6.55 (5.14,8.36) | 3.70 (3.51,3.89) | 2.65 (2.51,2.79) | 1.96 (1.62,2.38) | 2.67 (2.27,3.14) | 2.62 (2.47,2.79) | 2.40 (2.20,2.62) | 2.71 (2.56,2.88) | 2.59 (2.41,2.78) | 2.67 (2.50,2.86) |
| Stroke and Moderate CKD | 2.90 (2.69,3.11) | 2.73 (2.54,2.94) | 9.79 (7.83,12.24) | 3.77 (3.58,3.98) | 2.82 (2.67,2.98) | 2.82 (2.33,3.41) | 3.02 (2.61,3.50) | 2.78 (2.62,2.96) | 2.54 (2.31,2.78) | 2.94 (2.76,3.13) | 2.77 (2.58,2.97) | 2.87 (2.66,3.10) |
| Stroke and Severe CKD | 7.44 (6.49,8.53) | 6.19 (5.27,7.25) | 25.91 (19.06,35.22) | 8.07 (7.20,9.04) | 6.92 (6.21,7.71) | 6.02 (4.04,8.96) | 5.99 (4.12,8.71) | 7.21 (6.09,8.53) | 4.87 (3.94,6.02) | 7.90 (7.02,8.88) | 7.20 (6.30,8.23) | 6.37 (5.41,7.49) |
| Heart diseases and Severe CKD | 6.18 (5.59,6.84) | 5.11 (4.44,5.89) | 18.00 (13.88,23.34) | 8.04 (7.33,8.81) | 5.85 (5.38,6.36) | 4.29 (2.76,6.68) | 5.94 (4.24,8.31) | 5.85 (5.33,6.43) | 4.75 (4.06,5.54) | 6.33 (5.75,6.96) | 6.04 (5.42,6.74) | 5.49 (4.87,6.20) |
| Stroke, Heart diseases and Moderate CKD | 4.00 (3.60,4.45) | 3.10 (2.72,3.53) | 15.12 (9.50,24.07) | 5.27 (4.84,5.73) | 3.64 (3.35,3.96) | 2.96 (2.05,4.27) | 3.60 (2.72,4.78) | 3.64 (3.30,4.01) | 3.39 (2.91,3.94) | 3.69 (3.35,4.07) | 3.68 (3.28,4.12) | 3.53 (3.13,3.97) |
| Stroke, Heart diseases and Severe CKD | 8.74 (7.27,10.50) | 9.23 (7.50,11.36) | 62.18 (37.96,101.84) | 11.59 (10.02,13.40) | 9.25 (8.03,10.64) | 5.23 (2.61,10.48) | 9.86 (5.67,17.14) | 8.81 (7.43,10.44) | 8.49 (6.45,11.17) | 9.31 (7.94,10.91) | 10.32 (8.71,12.23) | 7.20 (5.67,9.14) |

CVD = Cardiovascular disease; CKD = Chronic Kidney Disease; CI = Confidence Interval; DM = Diabetes Mellitus; HbA1c = Hemoglobin A1c Test

Notes:

Age was treated as continuous variable

* Significant at 0.05 level by multivariable Cox proportional hazard regression adjusted by age, sex, smoking, duration of diabetes, systolic blood pressure, diastolic blood pressure, hemoglobin A1c, low density lipoprotein - cholesterol and body mass index, the use of anti-hypertensive drugs, use of anti-diabetes drugs and use of lipid-lowering agents.

Supplementary Table 6b. Adjusted hazard ratios of all-cause mortality by disease status at baseline in different subgroups

| Disease Status at Baseline | LDL-C (<2.6mmol/L) | LDL-C (≥2.6mmol/L) | BMI (<27.5kg/m2) | BMI (≥27.5kg/m2) | Use of Anti-hypertension drugs (No) | Use of anti-hypertension drugs (Yes) | Use of anti-diabetic drugs (No) | Use of anti-diabetic drugs (Yes) | Use of lowering lipid drugs (No) | Use of lowering lipid drugs (Yes) |
| --- | --- | --- | --- | --- | --- | --- | --- | --- | --- | --- |
| None of CVD or Moderate/Severe CKD | 1 (Reference) | 1 (Reference) | 1 (Reference) | 1 (Reference) | 1 (Reference) | 1 (Reference) | 1 (Reference) | 1 (Reference) | 1 (Reference) | 1 (Reference) |
| Stroke | 1.79 (1.70,1.88) | 1.87 (1.81,1.95) | 1.84 (1.77,1.91) | 1.86 (1.78,1.95) | 2.21 (2.07,2.37) | 1.78 (1.72,1.84) | 1.90 (1.79,2.03) | 1.84 (1.78,1.90) | 1.90 (1.83,1.96) | 1.72 (1.60,1.85) |
| Heart diseases | 1.44 (1.37,1.52) | 1.55 (1.48,1.62) | 1.48 (1.41,1.55) | 1.56 (1.49,1.64) | 1.47 (1.34,1.60) | 1.52 (1.46,1.57) | 1.48 (1.37,1.59) | 1.52 (1.47,1.58) | 1.54 (1.48,1.60) | 1.48 (1.37,1.59) |
| Moderate CKD | 1.70 (1.62,1.79) | 1.96 (1.89,2.03) | 1.82 (1.76,1.89) | 1.95 (1.87,2.04) | 2.14 (1.98,2.30) | 1.84 (1.78,1.89) | 1.99 (1.86,2.13) | 1.85 (1.80,1.91) | 1.85 (1.79,1.90) | 2.19 (2.00,2.39) |
| Severe CKD | 4.62 (4.23,5.05) | 4.86 (4.55,5.18) | 4.27 (3.98,4.58) | 5.66 (5.22,6.14) | 4.88 (4.21,5.65) | 4.76 (4.50,5.04) | 5.74 (5.13,6.42) | 4.58 (4.31,4.86) | 4.51 (4.26,4.78) | 6.93 (6.07,7.90) |
| Stroke and Heart diseases | 2.24 (2.06,2.45) | 2.73 (2.53,2.96) | 2.33 (2.15,2.53) | 2.74 (2.52,2.98) | 2.95 (2.53,3.45) | 2.45 (2.30,2.61) | 2.79 (2.50,3.12) | 2.43 (2.27,2.60) | 2.59 (2.41,2.78) | 2.43 (2.19,2.71) |
| Heart diseases and Moderate CKD | 2.48 (2.31,2.66) | 2.67 (2.49,2.86) | 2.49 (2.33,2.67) | 2.74 (2.55,2.94) | 2.52 (2.19,2.91) | 2.60 (2.47,2.75) | 2.73 (2.45,3.03) | 2.57 (2.43,2.72) | 2.50 (2.35,2.65) | 2.91 (2.65,3.19) |
| Stroke and Moderate CKD | 2.55 (2.34,2.77) | 2.95 (2.77,3.15) | 2.53 (2.36,2.71) | 3.25 (3.00,3.51) | 3.61 (3.13,4.16) | 2.71 (2.56,2.86) | 2.84 (2.54,3.18) | 2.80 (2.64,2.97) | 2.81 (2.65,2.98) | 2.83 (2.52,3.17) |
| Stroke and Severe CKD | 6.07 (5.20,7.08) | 7.43 (6.47,8.53) | 5.92 (5.11,6.85) | 8.05 (6.97,9.30) | 6.96 (5.04,9.61) | 6.79 (6.08,7.57) | 6.49 (5.24,8.03) | 6.95 (6.17,7.83) | 6.19 (5.49,6.99) | 9.37 (7.70,11.42) |
| Heart diseases and Severe CKD | 5.65 (5.03,6.34) | 5.70 (5.08,6.41) | 4.90 (4.37,5.49) | 6.91 (6.17,7.73) | 4.46 (3.53,5.64) | 5.97 (5.47,6.52) | 6.14 (5.24,7.20) | 5.66 (5.14,6.23) | 5.58 (5.06,6.15) | 6.29 (5.43,7.29) |
| Stroke, Heart diseases and Moderate CKD | 3.20 (2.85,3.59) | 3.95 (3.51,4.43) | 3.42 (3.07,3.80) | 3.82 (3.36,4.33) | 4.59 (3.61,5.82) | 3.47 (3.18,3.79) | 4.61 (3.91,5.42) | 3.34 (3.04,3.67) | 3.64 (3.29,4.03) | 3.56 (3.09,4.11) |
| Stroke, Heart diseases and Severe CKD | 9.80 (8.09,11.87) | 8.08 (6.64,9.83) | 9.02 (7.65,10.63) | 8.72 (6.85,11.11) | 5.86 (3.64,9.44) | 9.37 (8.11,10.82) | 11.63 (9.15,14.78) | 8.09 (6.84,9.58) | 7.65 (6.40,9.15) | 11.91 (9.61,14.76) |

CVD = Cardiovascular disease; CKD = Chronic Kidney Disease; CI = Confidence Interval; LDL-C = Low Density Lipoprotein – Cholesterol; BMI = Body Mass Index

Notes:

Age was treated as continuous variable

* Significant at 0.05 level by multivariable Cox proportional hazard regression adjusted by age, sex, smoking, duration of diabetes, systolic blood pressure, diastolic blood pressure, hemoglobin A1c, low density lipoprotein - cholesterol and body mass index, the use of anti-hypertensive drugs, use of anti-diabetes drugs and use of lipid-lowering agents.
